# Supplementary material
Source: publisher site journal article supplement (https://www.dovepress.com/article/330614)
Supplement: Supplementary file 1 [file get_supplementary_file.php]

**Supplementary Materials**

**Table S1.** The impact of compounds **10b** and **13b** on the absolute rat paw volume after carrageenan injection. Indomethacin was used as a reference drug. Experimental groups: C – control group receiving 0.5% CMC intragastrically (*i.g.)* and normal saline subplantarly (*s.pl*.); Car – carrageenan group receiving 0.5% CMC *i.g.* and 1% carrageenan solution *s.pl*.; Ind – indomethacin group receiving 10 mg/kg of indomethacin *i.g.* and 1% carrageenan solution *s.pl*.; **10b**-5, **10b**-10, and **10b**-20 – groups receiving, respectively, 5, 10 or 20 mg/kg of investigated compound **10b** *i.g.* and 1% carrageenan solution *s.pl*.; **13b**-5, **13b**-10, and **13b**-20 – groups receiving, respectively, 5, 10 or 20 mg/kg of investigated compound **13b** *i.g.* and 1% carrageenan solution *s.pl*. Data are presented as mean values ± SEM (n=12). Differences ** p<0.01 vs. control group; *** p<0.001 vs. control group; # p<0.05 vs. carrageenan group; ### p<0.001 vs. carrageenan group; ^^ p<0.01 vs. indomethacin group; ^^^ p<0.001 vs. indomethacin group were deemed statistically significant.

| Group | 0 h | 1 h | 2 h | | 3 h | 6 h |
| --- | --- | --- | --- | --- | --- | --- |
|  | | | paw volume [ml] | | |
| C | 1.47 ± 0.04 | 1.54 ± 0.04 | 1.57 ± 0.03 | | 1.62 ± 0.02 | 1.58 ± 0.03 |
| Car | 1.47 ± 0.01 | 2.03 ± 0.02*** | 2.64 ± 0.03*** | | 2.92 ± 0.03*** | 3.48 ± 0.04*** |
| Ind | 1,49 ± 0.03 | 1.84 ± 0.05** | 1.90 ± 0.05**### | | 1.90 ± 0.03### | 2.19 ± 0.06***### |
| **10b**-5 | 1.48 ± 0.02 | 2.01 ± 0.04 *** | 2.36 ± 0.06***#^^^ | | 2.80 ± 0.07***^^^ | 3.12 ± 0.07***^^^ |
| **10b**-10 | 1.49 ± 0.02 | 1.97 ± 0.04*** | 2.23 ± 0.03 ***###^^^ | | 2.34 ± 0.05***###^^^ | 2.75 ± 0.06***###^^^ |
| **10b**-20 | 1.49 ± 0.02 | 1.93 ± 0.07*** | 2.06 ± 0.05 ***### | | 2.11 ± 0.06***### | 2.50 ± 0.06***### |
| **13b**-5 | 1.47 ± 0.02 | 1.98 ± 0.03*** | 2.31 ± 0.04***###^^^ | | 2.49 ± 0.06***###^^^ | 3.06 ± 0.08***#^^^ |
| **13b**-10 | 1.48 ± 0.03 | 1.95 ± 0.03*** | 2.14 ± 0.04***### | | 2.17 ± 0.05***###^^ | 2.48 ± 0.05***###^^^ |
| **13b**-20 | 1.48 ± 0.02 | 1.85 ± 0.04** | 1.97 ± 0.04***### | | 2.03 ± 0.06 ***### | 2.23 ± 0.04***### |
